# Supplementary material for: Cytotoxicity of targeted PLGA nanoparticles: a systematic review
Source: RSC Adv. 2021 Mar 3;11(16):9433–49. doi: 10.1039/d1ra00074h (PMC8695459; doi:10.1039/d1ra00074h)
Supplement: RA-011-D1RA00074H-s001 [file RA-011-D1RA00074H-s001.xlsx]

## Sheet: Sheet1
Size and Cytotoxicity											Zeta Potential and Cytotoxicity
Particle Size (nm)	IC50 (µg/mL)										Range of Zeta Potential (mV)	Frequency	Mean IC50 (µg/mL)	IC50 (µg/mL)	Zeta Potential (mV)
58	4.12										40 to 50	1	1.84	1.84	49.1
91.2	0.048										20 to 30	8	10.725	0.011	29.5
91.2	0.093													0.024	29.5
96	0.01													0.0017	29.5
102.3	3.67													4.6	27
108	0.0033													0.78	27
110	6.71													0.34	27
111.3	2.338													0.043	22
118	2.7													80	21.7
123	0.48										10 to 20	5	1.28995	4.91	19.59
124.2	0.114													1.42	19.59
124.2	0.00078													0.114	12
124.2	0.00497													0.00078	12
132.4	9.95													0.00497	12
132.4	9.95										0 to 10	5	0.14828	0.0057	9
137.3	0.185													0.0057	9
138	0.78													0.04	9
138	0.38													0.04	9
138.5	7.28													0.65	5.29
141	0.42										0 to -10	16	1.76244	8.12	-1
141	2.73													0.37	-1
141	3.11													0.61	-1
146.9	0.01403													0.42	-2.61
146.9	0.00579													2.73	-2.61
146.9	0.00322													3.11	-2.61
150	1.03													0.062	-3.5
150	0.13													1.019	-3.9
150	4													0.087	-3.9
151	0.509													1.007	-3.9
151.7	0.61													0.137	-3.9
151.7	8.12													0.061	-3.9
151.7	0.37													0.028	-3.9
153.41	1.84													5.4	-5.6
154	0.91													2.338	-6.17
156	0.01													2.7	-8.5
165.4	0.051										-10 to -20	20	1.15371	3.67	-13.2
165.61	4.91													0.02611	-13.8
165.61	1.42													2	-14.1
170.3	0.00031													1.66	-15.4
170.3	0.00049													0.79	-15.4
180	0.043													0.0028	-16
184.6	0.073													0.09	-16
184.6	0.027													7.6	-16.7
184.6	0.053													0.0396	-16.7
184.6	0.039													0.185	-17.63
190.91	1.86													1.03	-18.1
190.91	0.8													0.13	-18.1
194.97	1.66													0.0118	-18.2
194.97	0.79													3.1	-18.2
200	0.0057													0.00031	-18.9
200	0.04													0.00049	-18.9
200	0.0028													0.044	-19
200	0.09													0.034	-19
204	5.4													1.86	-19.3
206.9	80													0.8	-19.3
207	0.65										-20 to -30	9	1.03059	0.0033	-21.32
209.4	0.0396													4	-21.57
209.4	7.6													0.91	-22.7
210	4.6													0.05	-25
210	0.78													0.053	-28.6
210	0.34													0.039	-28.6
217	0.011													0.073	-28.6
217	0.024													0.027	-28.6
217	0.0017													4.12	-29.4
218.2	0.0118										-30 to -40	3	2.41367	0.48	-30.5
218.2	3.1													6.71	-32
240	0.034													0.051	-37.2
240	0.044										-40 to -50	4	7.57	9.95	-40.3
250	0.04													9.95	-40.3
250	0.0057													7.28	-43.03
274	0.02611													3.1	-45
286	30										-60 to -70	2	0.0705	0.093	-60.7
288.4	2													0.048	-60.7
294.7	0.000754
330	1.019
330	0.087
330	1.007
330	0.137
330	0.061
330	0.028
341.8	0.062
406.6	0.05
